# Supplementary material for: Neurophysiological Evidence for a Compensatory Activity during a Simple Oddball Task in Adolescents with Type 1 Diabetes Mellitus
Source: J Diabetes Res. 2018 Jul 8;2018:8105407. doi: 10.1155/2018/8105407 (PMC6079416; doi:10.1155/2018/8105407)
Supplement: Supplementary Materials — Table 1: demographic, clinical, behavioral, and electrophysiological data used for statistical evaluation. The first row describes variables as follows: ID: subject identification number; Group: T1D (patients), CON (controls); Sex: 1 (female), 0 (male); Age: age at the time of examination; T1D duration: illness duration; Recorded eye: dominant eye examined; Visual Acuity: fraction 1~4/4 (measured from 4 meters); HbA1c_actual: hemoglobin A1c at time of examination; HbA1c_avg: average hemoglobin A1c; HbA1c_var: variability of hemoglobin A1c; R40_latency: implicit time of dominant peak P100 of pattern-reversal VEPs evoked by reversing chessboard with checks of 40′; R20_latency: similar to preceding but evoked with checks 20′; M20_latency: peak time of dominant peak N2 of motion-onset VEPs evoked by radial motion outside of central 20°; C8_latency: similar to preceding but evoked by motion in central 8°; P300_latency: peak time of dominant peak P300 of ERPs recorded during oddball test; R40_amplitude, R20_amplitude, M20_amplitude, C8_amplitude, and P300_amplitude: amplitudes for appropriate VEP/ERP peaks; P300_auc: area under curve of the peek P300; Reaction_time: reaction time recorded during the oddball test. For details of determining single variables, see Methods. Every row from the third to 43th lists subjects' data. [file 8105407.f1.csv]

ID	Group	Sex	Age	T1D duration	Recorded eye	Visual Acuity	HbA1c_actual	HbA1c_avg	HbA1c_var	R40_latency	R20_latency	M20_latency	C8_latency	P300_latency	R40_amplitude	R20_amplitude	M20_amplitude	C8_amplitude	P300_amplitude	P300_auc	Reaction_time
			Years	Years		-	mmol/mol	mmol/mol		ms	ms	ms	ms	ms	uV	uV	uV	uV	uV	uV*ms	ms
1	T1D	1	14	12	Right	0,67	79	72,8	0,066900077	106	114	132	168	356	21,1	25,9	11,5	7,6	39,4	3632	328
2	T1D	0	16	13	Right	1	57	68	0,10241462	104	108	148	168	396	13,3	17,2	7,7	5,3	15,7	2297	332
3	T1D	1	16	9	Right	0,67	60	63,3	0,063594979	102	110	176	195	356	19,8	21,4	2,5	1,5	18,6	1134	328
4	T1D	1	18	12	Right	0,8	64	63	0,033671751	102	110	172	174	384	13,4	15,4	8,3	5,6	13,9	2580	376
5	T1D	1	14	9	Right	0,8	69	69,7	0,070645086	106	106	166	169	420	23,4	23,4	10,3	2,6	28,8	3331	340
6	T1D	0	14	5	Right	1	65	59,3	0,081271562	104	106	154	156	368	13,7	11,9	12,2	6,3	40,4	4423	336
7	T1D	0	12	3	Right	1	63	69,3	0,196775741	122	116	158	152	389	6,5	7,1	10,5	8,9	29,2	5421	388
8	T1D	1	16	5	Left	1	66	65,5	0,041108128	114	112	184	182	428	7,9	9,4	6,3	4,5	21,2	3018	412
9	T1D	0	18	2	Right	1	38	47,8	0,12856575	114	118	156	166	440	9,7	9,9	7,3	3,6	20,2	1862	356
10	T1D	1	17	5	Left	1	64	64,8	0,104390006	106	114	141	181	384	6,0	4,4	3,9	1,2	36,3	4348	352
11	T1D	0	13	2	Left	1	72	68	0,046504083	114	108	142	148	408	8,3	4,1	7,9	7,4	20,7	2829	392
12	T1D	1	16	7	Right	0,67	86	79,8	0,050449771	114	120	158	160	372	23,3	17,4	8,8	4,9	32,0	5249	404
13	T1D	1	16	5	Right	0,8	120	125,5	0,117715432	102	112	146	154	364	4,7	8,3	5,0	5,7	23,7	2340	320
14	T1D	1	15	12	Right	1	72	77,5	0,07440363	110	108	168	171	344	19,9	20,5	12,5	9,3	43,8	3384	336
15	T1D	0	17	7	Right	0,67	85	87	0,022988506	116	122	170	144	336	17,7	16,1	5,2	5,9	26,5	2091	316
16	T1D	0	15	10	Right	1	72	69,3	0,057194872	106	110	200	211	380	15,7	14,8	4,9	4,8	34,0	4186	388
17	T1D	0	14	12	Right	0,8	65	63	0,048923921	106	112	200	200	392	9,6	9,9	4,7	5,5	21,1	2528	384
18	T1D	1	14	8	Right	0,5	71	64,8	0,069390737	110	110	144	164	404	11,0	8,3	7,7	7,4	21,9	2640	384
19	T1D	1	14	10	Left	1	132	109	0,127947942	108	110	142	150	384	12,1	10,1	4,3	2,4	27,8	2716	368
20	T1D	0	13	8	Right	1	76	69	0,075306557	108	108	148	144	396	11,7	7,7	6,9	8,4	46,6	4794	348
21	T1D	1	16	5	Right	0,8	80	79,8	0,114022153	110	104	166	174	368	13,6	5,6	8,4	6,8	23,5	2969	356
22	T1D	0	18	9	Left	1	51	49,8	0,043518865	102	104	154	146	348	4,4	3,7	9,0	8,3	27,9	3276	308
23	CON	1	17		Right	1				100	106	156	174	368	13,6	10,6	5,8	5,5	37,5	2798	340
24	CON	1	16		Right	1				102	106	171	193	404	21,8	17,5	5,7	2,7	27,6	4061	352
25	CON	1	18		Right	0,8				102	106	189	198	364	16,2	19,6	3,2	4,3	18,3	2593	324
26	CON	1	17		Right	0,5				104	104	146	174	396	13,6	14,0	13,6	13,0	25,3	3815	340
27	CON	1	17		Right	1				110	108	154	146	432	15,7	14,1	11,7	6,5	39,6	3980	428
28	CON	1	17		Right	1				104	110	174	146	368	9,9	10,7	10,2	7,6	28,0	2049	356
29	CON	1	17		Right	1				94	96	156	166	332	10,9	16,0	18,3	8,3	42,4	3037	288
30	CON	1	16		Left	1				106	106	138	158	337	26,5	27,2	4,4	7,3	12,6	2426	392
31	CON	0	17		Right	1				110	112	148	126	384	15,2	15,8	8,6	3,7	21,5	1755	368
32	CON	0	16		Right	1				104	102	170	167	424	9,7	7,4	5,4	3,5	16,4	1450	376
33	CON	0	13		Left	1				106	108	174	191	356	16,7	16,9	6,2	6,7	23,6	1807	308
34	CON	0	16		Right	1				112	106	164	146	348	11,2	6,2	10,8	7,5	29,5	2707	340
35	CON	1	15		Left	0,8				102	106	172	181	348	11,1	12,1	4,6	4,0	25,3	1869	324
36	CON	0	17		Right	1				104	108	188	192	376	22,5	25,2	8,5	3,8	18,4	2446	340
37	CON	1	21		Left	0,8				104	108	167	178	356	18,0	16,4	8,2	4,7	22,3	1611	324
38	CON	0	14		Right	1				106	112	164	173	388	13,2	13,8	4,3	2,6	17,5	1797	352
39	CON	1	14		Right	0,67				104	110	174	162	380	16,0	19,5	3,2	5,2	20,9	2937	392
40	CON	0	10		Right	1				106	110	182	182	332	19,8	19,2	5,7	5,5	21,3	2106	416
41	CON	0	14		Right	1				110	110	158	140	348	21,2	19,2	9,4	10,2	31,5	3490	348
